# Supplementary material
Source: publisher figshare collection journal article supplement (https://karger.figshare.com/articles/dataset/_/7228421)

**Figure S1. Mean annual change in eGFR in patients in the overall study population with rapid disease progression and slow disease progression**

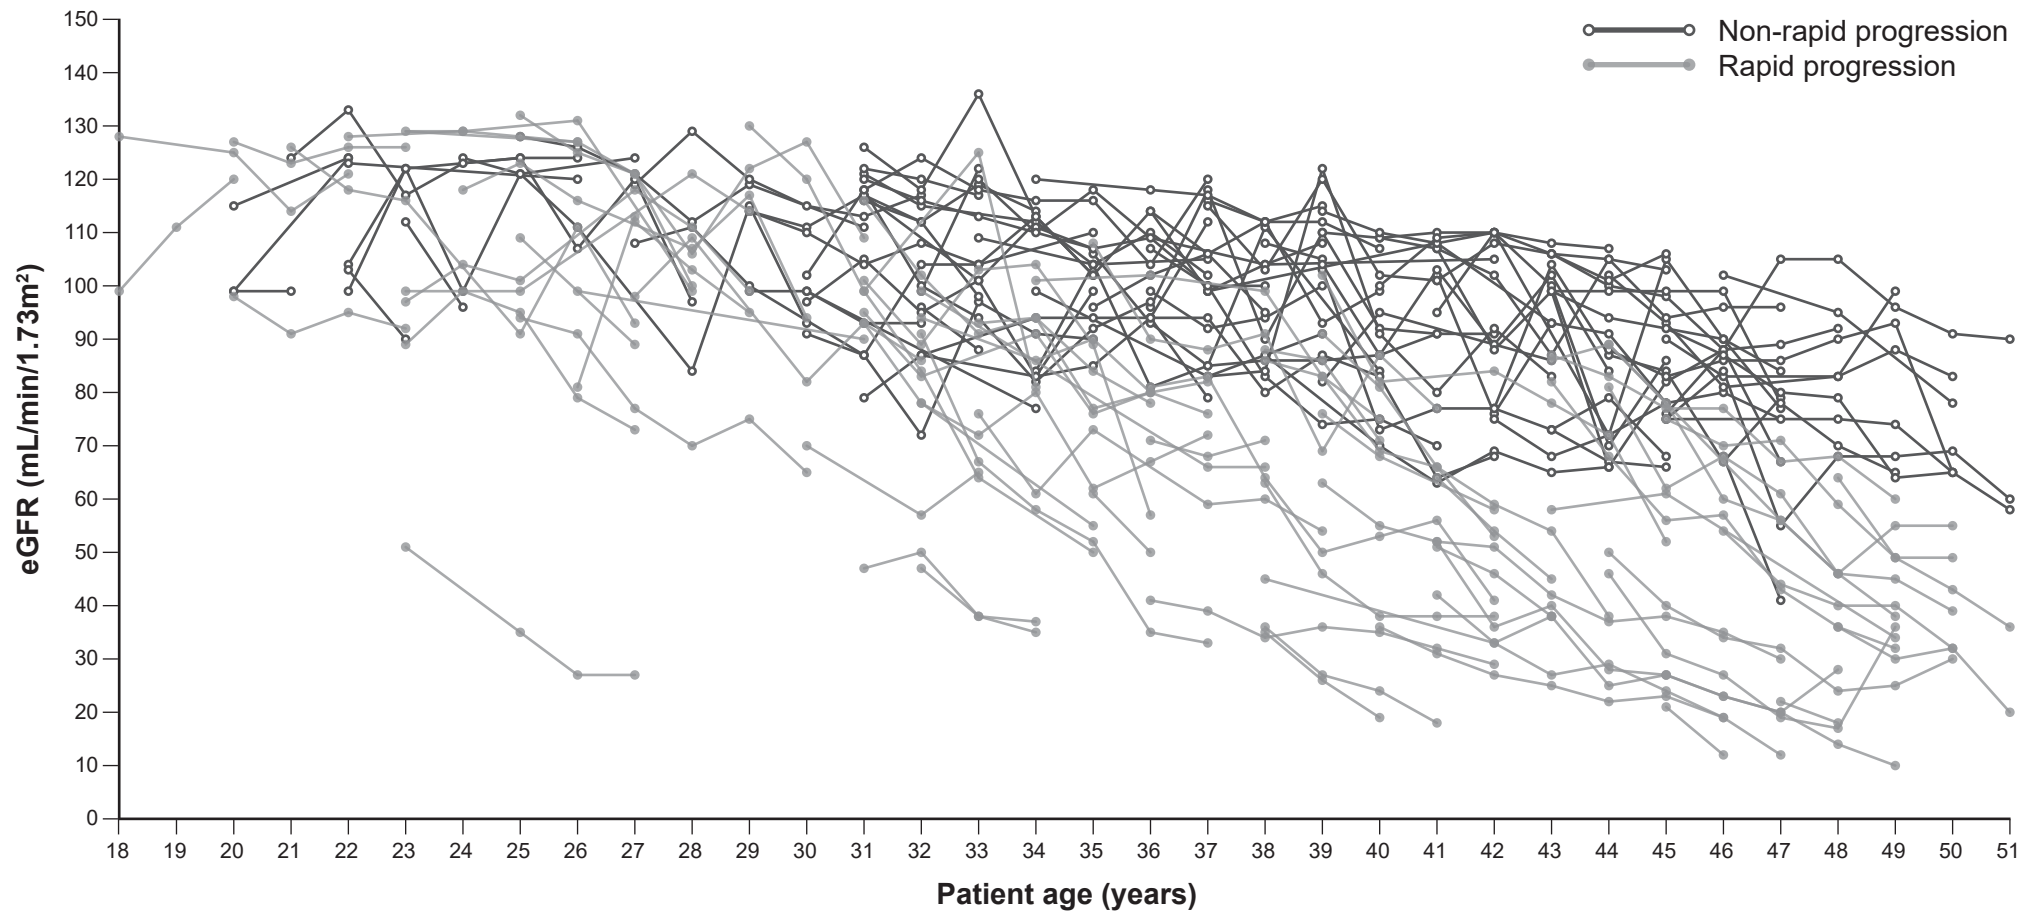

Supplement: Supplementary file 2 [file 1]
