# Supplementary material
Source: publisher figshare collection journal article supplement (https://karger.figshare.com/articles/dataset/_/7228421)

**Figure S2. Annual change in individual patient eGFR in overall study population**

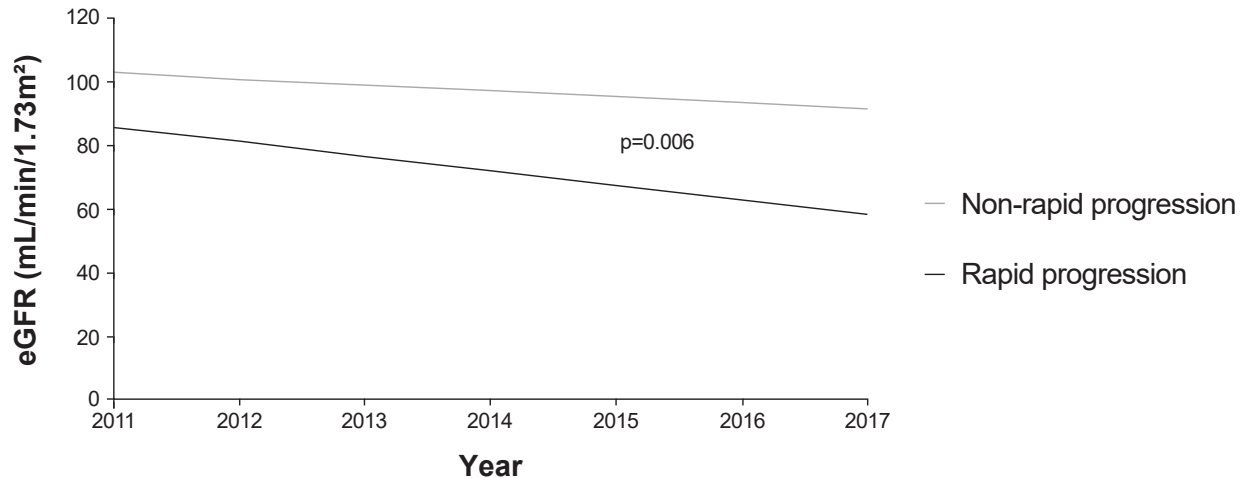

Supplement: Supplementary file 1 [file 1]
